# Supplementary material
Source: PubMed Central journal article supplement (PMC2836672)
Supplement: 0910213107_pnas.200910213SI.pdf [file 0910213107_pnas.200910213SI.pdf]

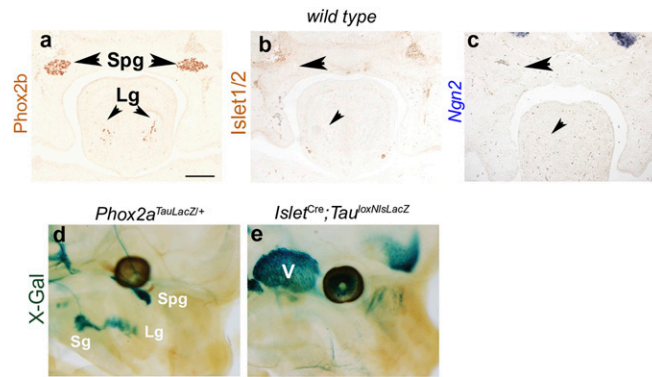

**Fig. 55.** Neither *Islet1* nor *Ngn2* expression is detected in parasympathetic ganglia. (A–C) Transverse sections through the head of E13.5 wild-type embryos, stained with immunohistochemistry with *Phox2b* (A) or *Islet1/2* (B) or hybridized with a *Ngn2* probe (C). The black arrowheads in B and C point to the unstained Spg and Lg ganglia. (D and E) X-gal staining on whole E13.5 embryos in the indicated genetic backgrounds. Expression of *LacZ* from the *Phox2a* locus reveals the Spg and S/Lg (D); no *LacZ* activity is detected in parasympathetic ganglia when reporter expression is controlled by the *Islet1* promoter (E). Lg: lingual ganglion; Sg: submandibular ganglion; Spg: sphenopalatine ganglion; V: trigeminal ganglion. (Scale bar, 200  $\mu$ m.)

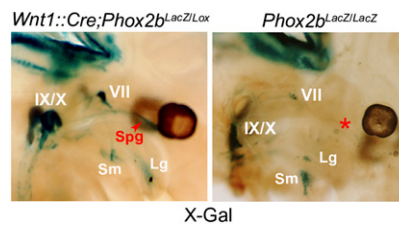

**Fig. 56.** Spg precursors are transiently detected in *Wnt1::Cre;Phox2b<sup>LacZ/lox</sup>* but not in *Phox2b<sup>LacZ/LacZ</sup>* mutants. X-gal staining on whole E12.5 embryos in the indicated genetic background. The red asterisk indicates the absence of the Spg precursors in *Phox2b<sup>LacZ/LacZ</sup>* embryos. Note that the VII and the IX/X ganglia are also affected in this mutant, but they are spared in *Wnt1::Cre;Phox2b<sup>LacZ/lox</sup>* because of removal of *Phox2b* in neural crest cells only. Lg: lingual ganglion; Sg: submandibular ganglion; Spg: sphenopalatine ganglion; VII: geniculate ganglion; IX/X: petrose/nodose ganglionic complex.
